# Supplementary material for: Ligand directed structural diversity and magnetism in copper(ii)–azido assemblies with isomeric aminopyridines: synthesis, structure, magnetism and theoretical studies
Source: Royal Society of Chemistry journal article supplement (doi:10.1039/c7dt03115g), 2017-01-01
Supplement: c7dt03115g1.pdf [file c7dt03115g1.pdf]

Supplementary Figures

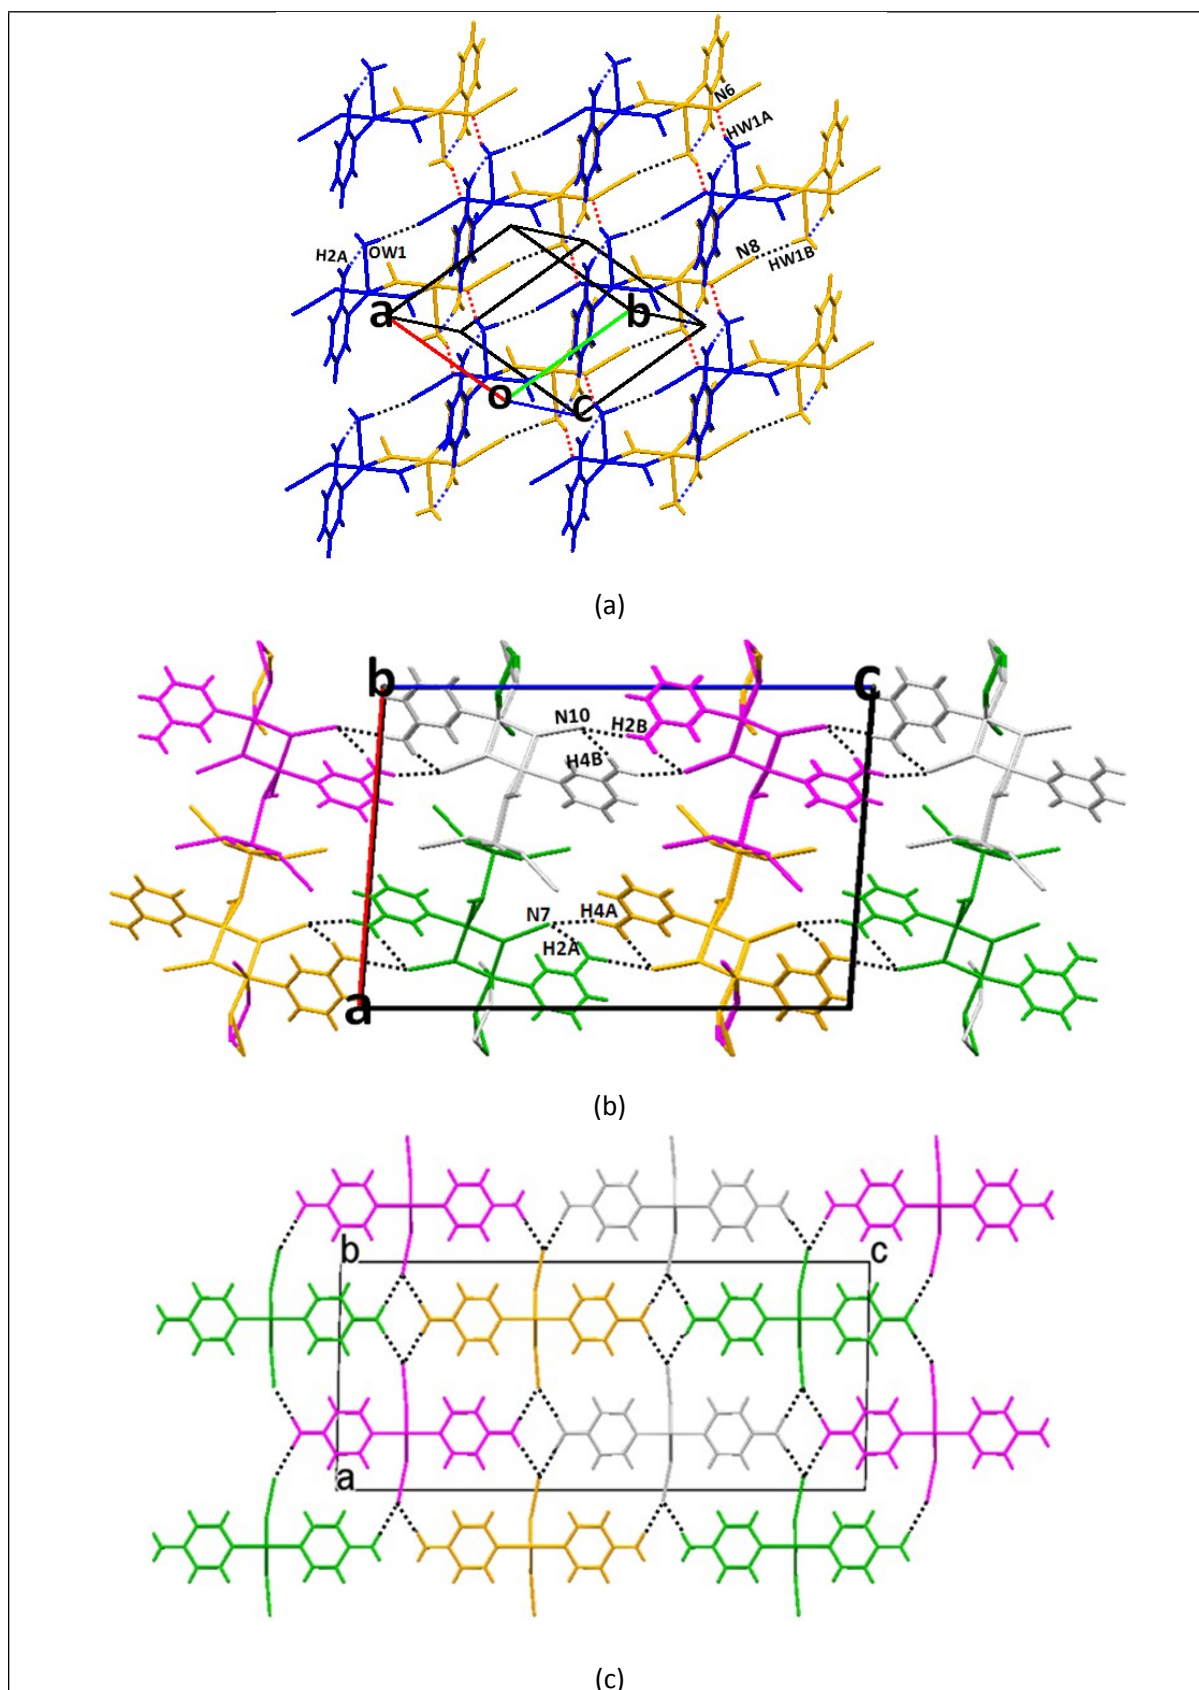

Fig S1. Unit cell packing showing (a) 2-D layer of hydrogen bonded (dotted lines) dimers in **1**. (Inversion related units are shown in blue and yellow colors); (b) H-bond interactions (black broken lines) between amino hydrogens and azide units in **2**; (c) 2-D layer of hydrogen bonded chains (black dotted lines) in ac plane in **4**.

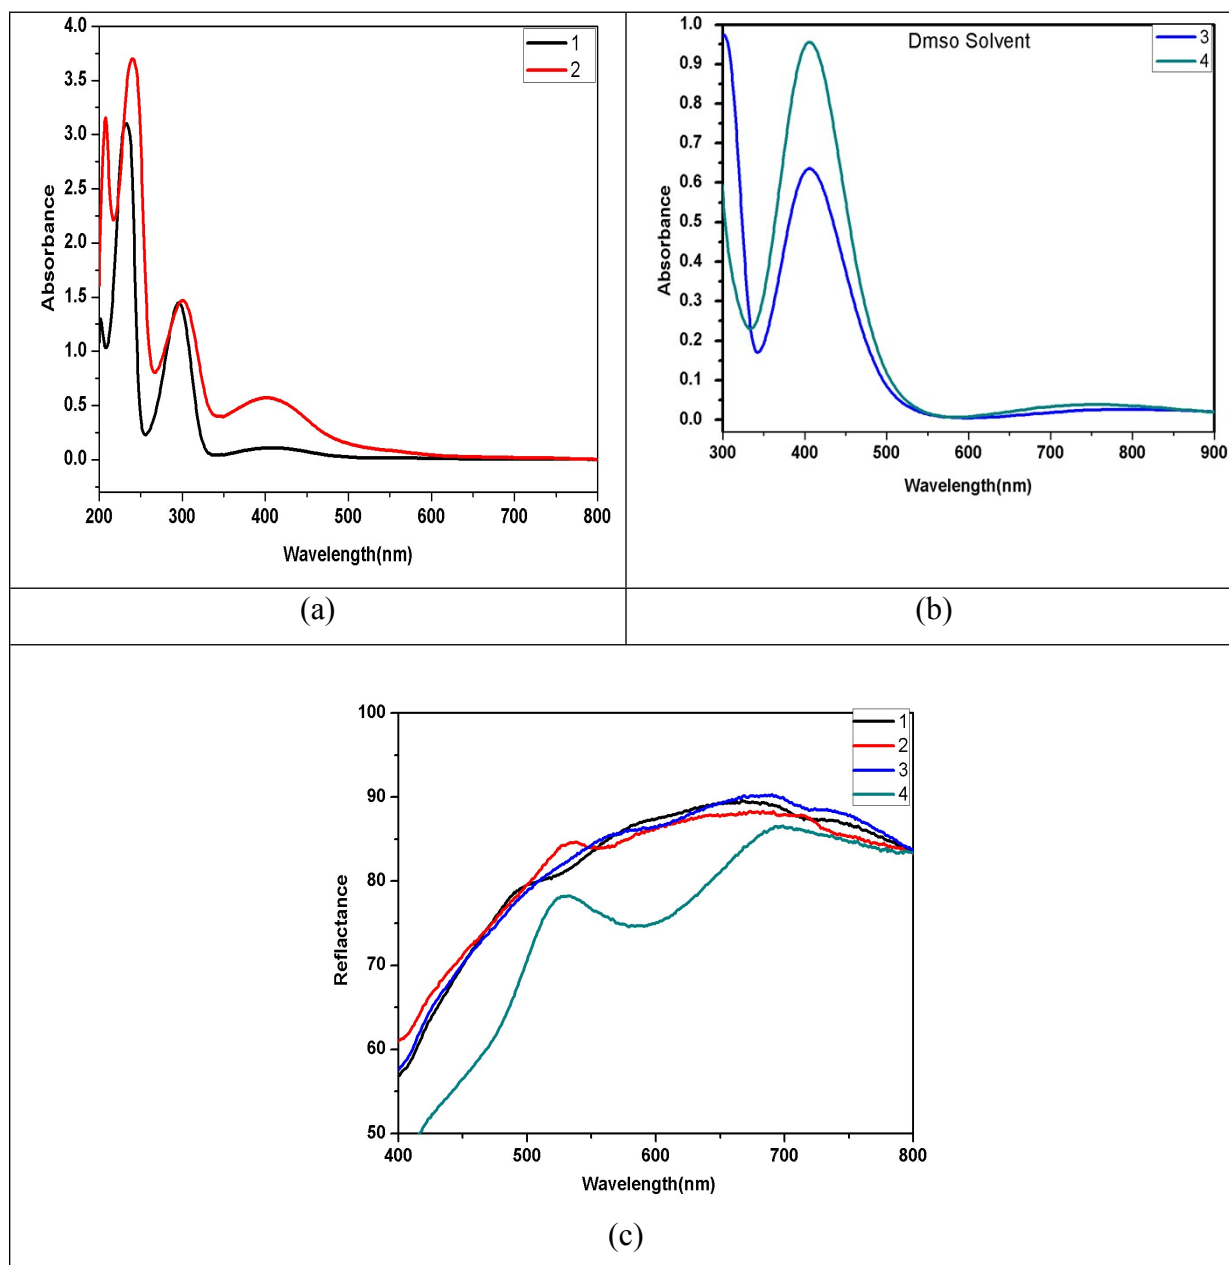

**Figure S2.** UV-Visible spectra of complexes (a) **1** & **2** in methanol; (b) **3** & **4** in DMSO; (c) Powder diffuse reflectance spectra of **1**, **2**, **3** and **4**.

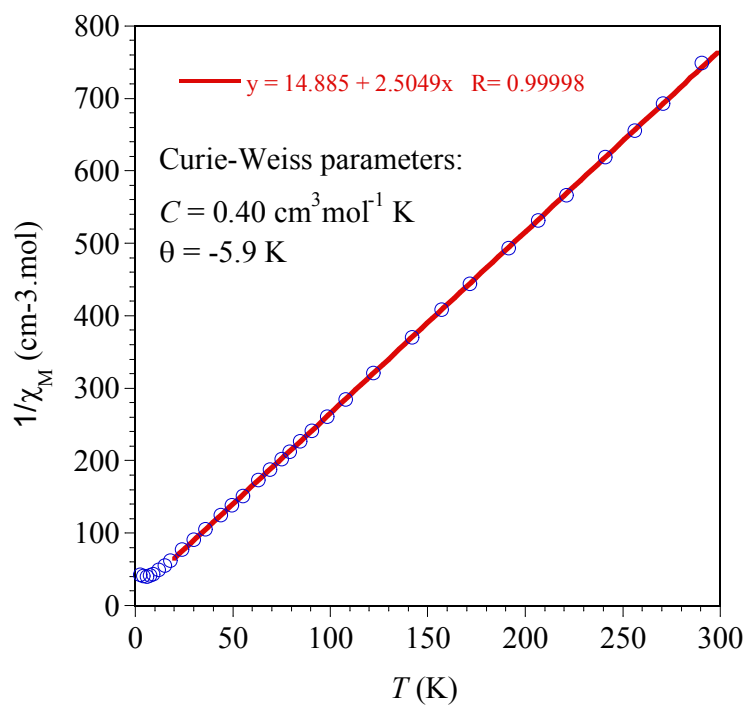

**Figure S3:**  $1/\chi_M = f(T)$  for compound **3** (○) with Curie-Weiss analysis (—); best fit parameters are given in the plot.
